# Supplementary material for: Endothelial Dysfunction in Nonalcoholic Fatty Liver Disease: A Systematic Review and Meta-Analysis
Source: MDPI journal article supplement (doi:10.3390/life12050718), 2022-05-11
Supplement: s1 [file s1]

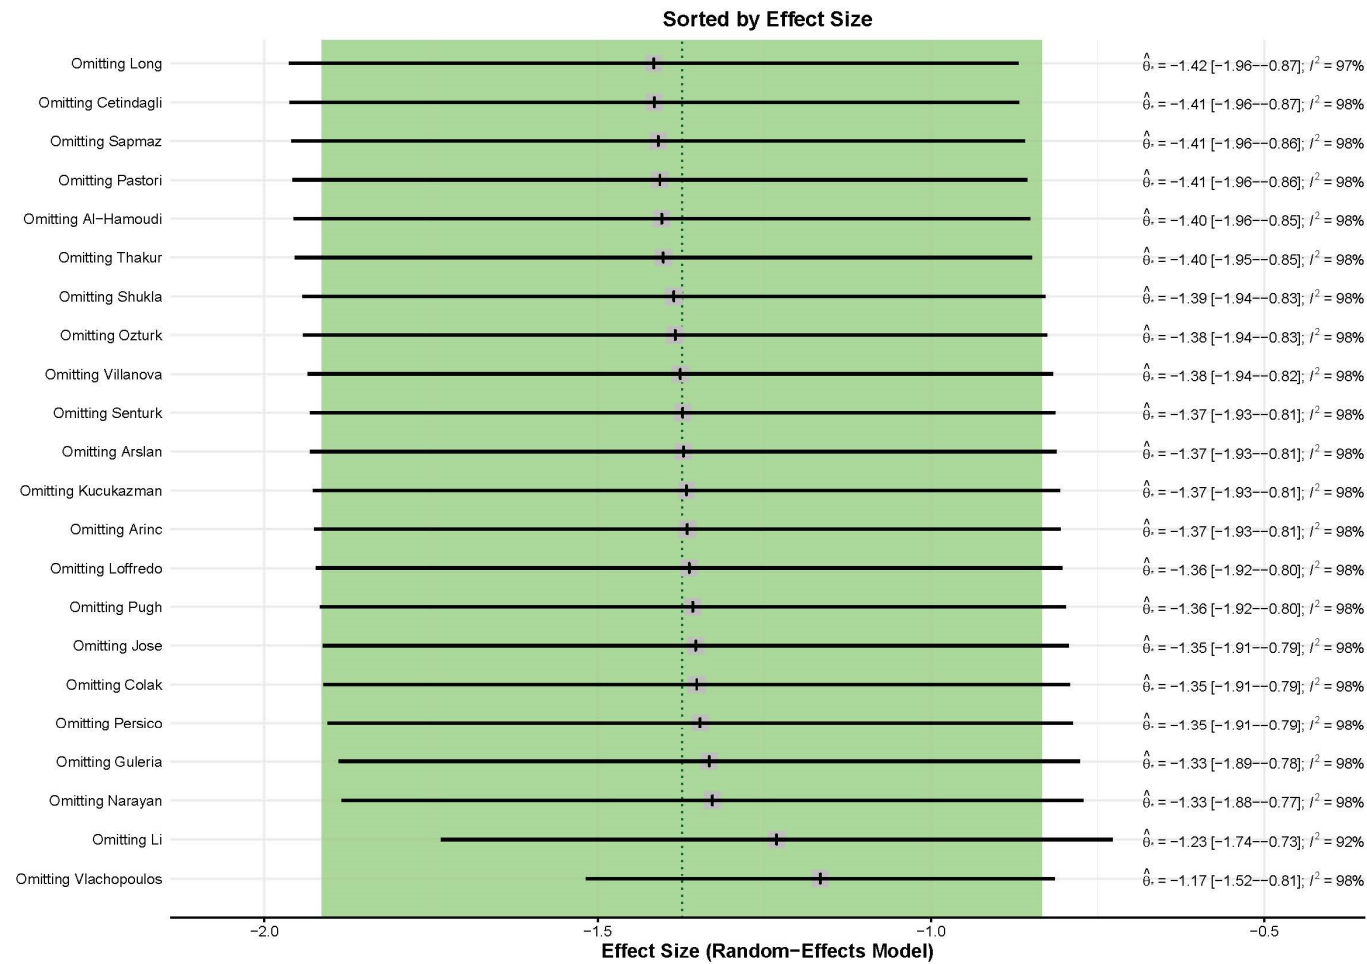

**Figure S1.** Leave-one-out sensitivity analysis, ordered by effect size ( $\theta$ ), demonstrating that even after exclusion of any single study, the outcome of the meta-analysis concerning the difference in FMD between NAFLD and control subjects remained unaffected.  $I^2$  represents between-study heterogeneity and horizontal error bars denote the 95% confidence intervals.

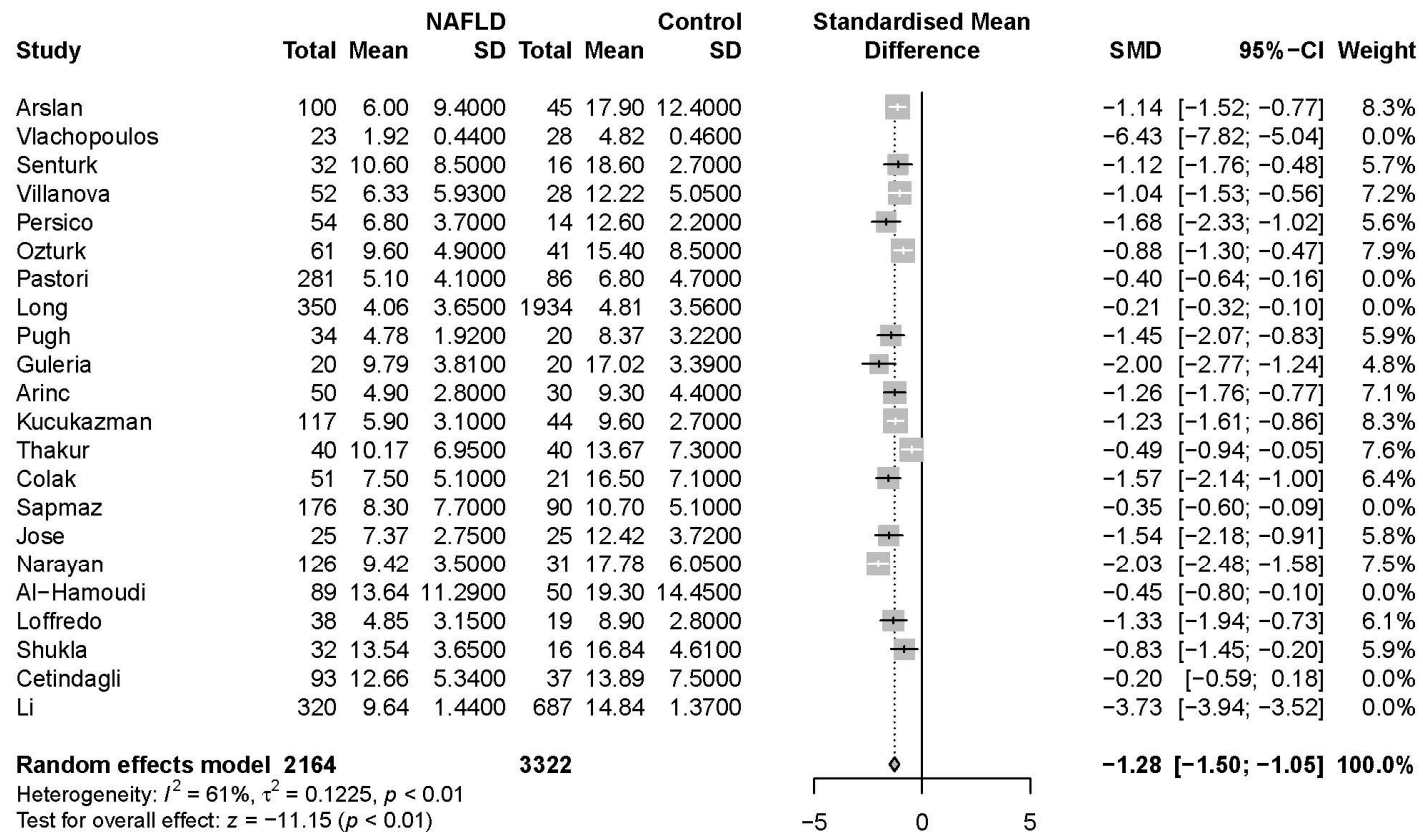

**Figure S2.** Forest plot displaying the updated meta-analysis of FMD difference between individuals with NAFLD and controls after removal of influential studies, demonstrating a significantly more impaired FMD in the NAFLD group. Effect sizes were pooled according to the random-effects model.  $I^2$  was used as a measure of between-study statistical heterogeneity. Results are expressed as standardized mean difference (SMD) with horizontal error bars denoting the 95% confidence intervals (CIs). The size of each square represents the relative weight of that study in the overall meta-analytic result.

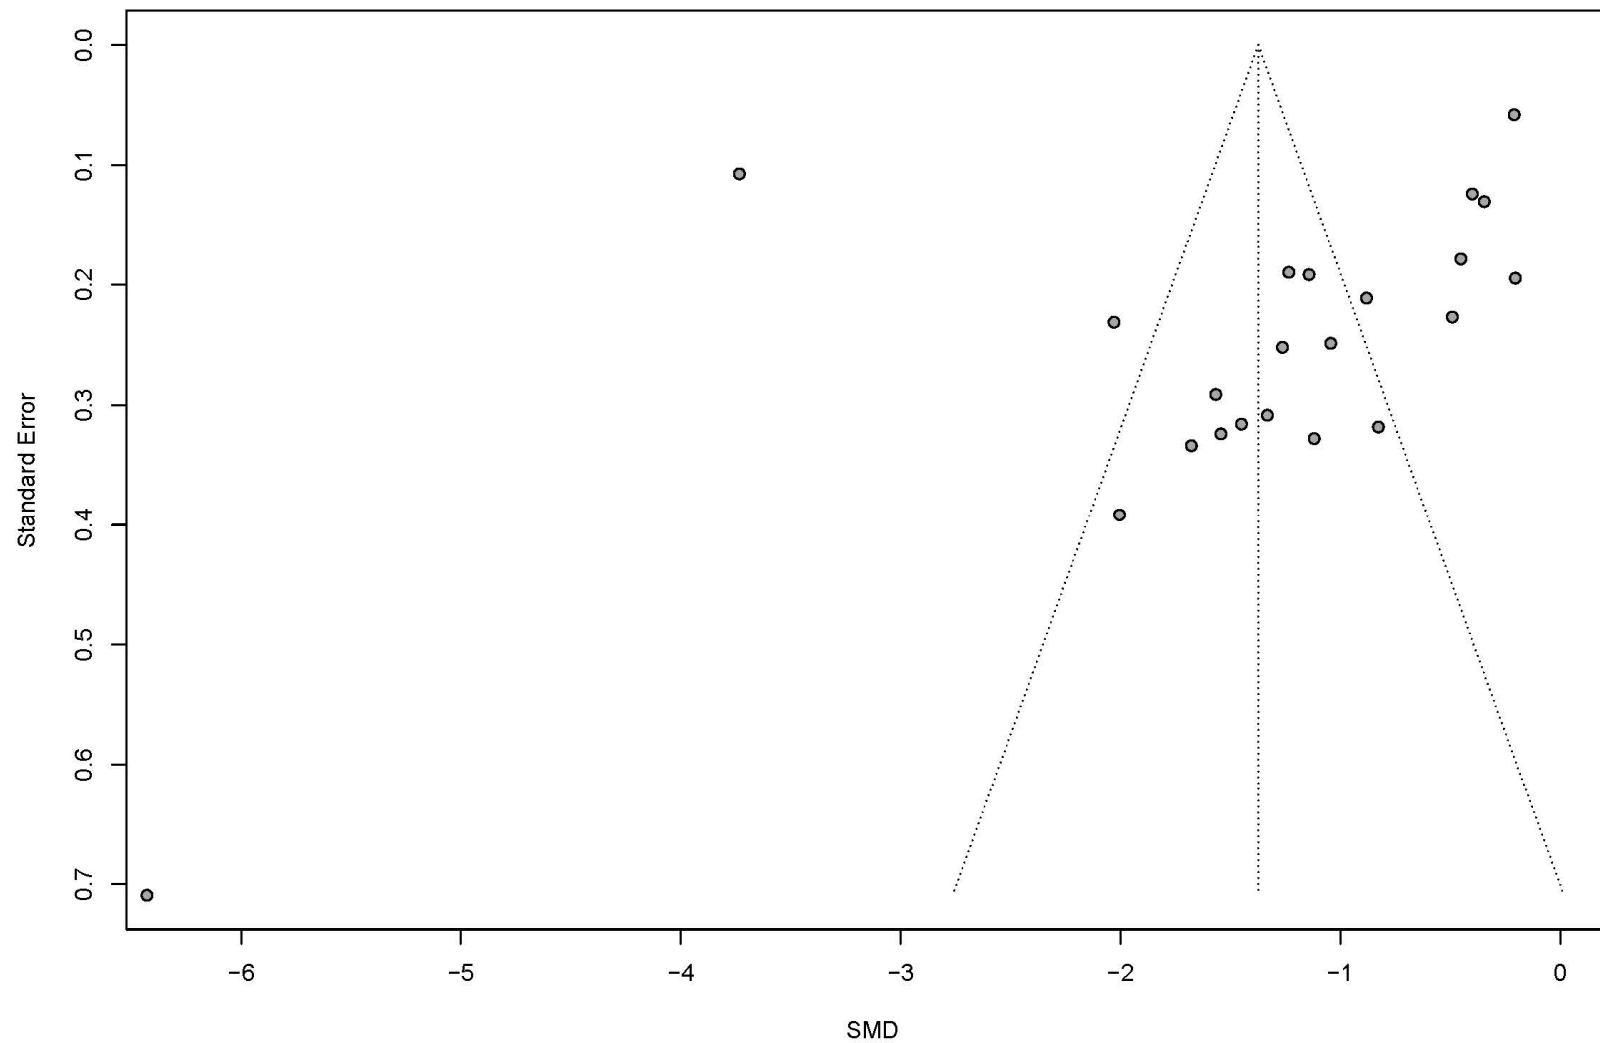

**Figure S3.** Inspection of symmetric funnel plots of the difference in FMD between NAFLD and control subjects. Hedge's  $g$  was used as the effect size metric plotted against the sample size-based precision estimate.
